# Supplementary material for: A Role for Strain Differences in Waveforms of Ultrasonic Vocalizations during Male–Female Interaction
Source: PubMed Central journal article supplement (PMC3144874; doi:10.1371/journal.pone.0022093), 2011-07-27
Supplement: pone.0022093.s001.pdf [file pone.0022093.s001.pdf]

**A**

## Male behavior

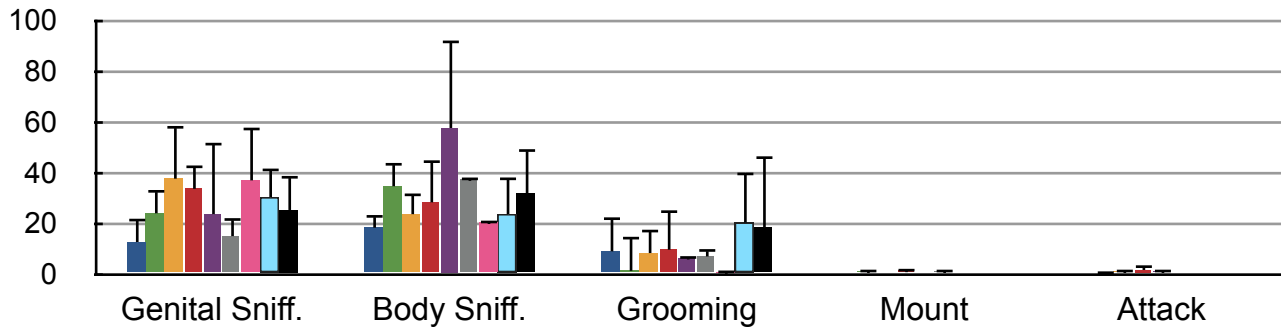**B**

## Female behavior

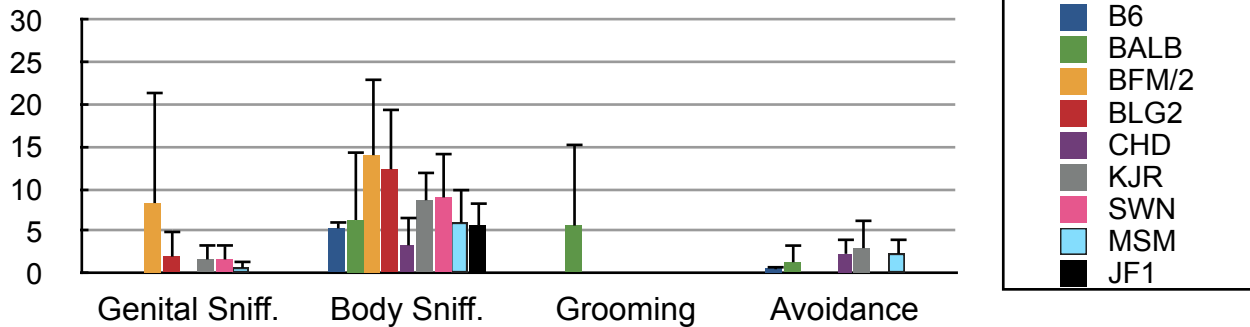

Figure S1
