# Supplementary material for: A Role for Strain Differences in Waveforms of Ultrasonic Vocalizations during Male–Female Interaction
Source: PubMed Central journal article supplement (PMC3144874; doi:10.1371/journal.pone.0022093), 2011-07-27
Supplement: pone.0022093.s002.pdf [file pone.0022093.s002.pdf]

Table S1. Criteria of classification for ultrasonic vocalization patterns.

| Category name | Criteria                                                                          |
|---------------|-----------------------------------------------------------------------------------|
| Short         | $< 5$ ms                                                                          |
| Flat          | Max Peak–Min Peak $< 6.25$ kHz                                                    |
| Upward        | End–Start $\geq 6.25$ kHz, End–Start $\geq$ Max Peak–End                          |
| Downward      | Start–End $\geq 6.25$ kHz, Start–End $\geq$ Min–End                               |
| A-type        | $ \text{Start–End}  < 6.25$ kHz, Max–Start $\geq 6.25$ kHz, End–Start $<$ Max–End |
| U-type        | $ \text{Start–End}  < 6.25$ kHz, Start–Min $\geq 6.25$ kHz, Start–End $<$ Min–End |
| Complex       | Two or more directional changes, each $\geq 6.25$ kHz                             |
| Jump          | More than one jump                                                                |
| Harmonic      | More than two parallel horizontal lines in the spectrogram                        |

|| indicate absolute value.
