# Supplementary material for: A Role for Strain Differences in Waveforms of Ultrasonic Vocalizations during Male–Female Interaction
Source: PubMed Central journal article supplement (PMC3144874; doi:10.1371/journal.pone.0022093), 2011-07-27
Supplement: pone.0022093.s003.pdf [file pone.0022093.s003.pdf]

Table S2. P-values from ANOVA for variables of each waveform category.

| Variables                   | Flat               | Short            | Upward            | Downward          | Harmonic           | Complex            | A-type            | U-type            | Jump              |
|-----------------------------|--------------------|------------------|-------------------|-------------------|--------------------|--------------------|-------------------|-------------------|-------------------|
| Duration                    | <b>p&lt;0.01</b>   | <b>p&lt;0.05</b> | No                | No                | <b>p&lt;0.01</b>   | <b>p&lt;0.01</b>   | <b>p&lt;0.01</b>  | <b>p&lt;0.05</b>  | No                |
| Start frequency             | <b>p&lt;0.05</b>   | <b>p&lt;0.05</b> | <b>p&lt;0.01</b>  | <b>p&lt;0.01</b>  | <b>p&lt;0.0001</b> | <b>p&lt;0.0001</b> | <b>p&lt;0.01</b>  | <b>p&lt;0.001</b> | <b>p&lt;0.001</b> |
| End frequency               | <b>p&lt;0.001</b>  | <b>p&lt;0.05</b> | <b>p&lt;0.01</b>  | <b>p&lt;0.001</b> | <b>p&lt;0.001</b>  | <b>p&lt;0.001</b>  | <b>p&lt;0.001</b> | <b>p&lt;0.05</b>  | <b>p&lt;0.01</b>  |
| Mid frequency               | <b>p&lt;0.01</b>   | <b>p&lt;0.05</b> | <b>p&lt;0.01</b>  | <b>p&lt;0.01</b>  | <b>p&lt;0.0001</b> | <b>p&lt;0.01</b>   | <b>p&lt;0.01</b>  | <b>p&lt;0.01</b>  | <b>p&lt;0.001</b> |
| Minimum frequency           | <b>p&lt;0.001</b>  | <b>p&lt;0.05</b> | <b>p&lt;0.001</b> | <b>p&lt;0.001</b> | <b>p&lt;0.0001</b> | <b>p&lt;0.0001</b> | <b>p&lt;0.01</b>  | <b>p&lt;0.01</b>  | <b>p&lt;0.001</b> |
| Duration until Minimum peak | <b>p&lt;0.0001</b> | No               | No                | <b>p&lt;0.05</b>  | No                 | No                 | No                | <b>p&lt;0.05</b>  | No                |
| Maximum frequency           | <b>p&lt;0.01</b>   | <b>p&lt;0.05</b> | No                | <b>p&lt;0.01</b>  | <b>p&lt;0.001</b>  | <b>p&lt;0.05</b>   | <b>p&lt;0.01</b>  | No                | <b>p&lt;0.01</b>  |
| Duration until Maximum peak | <b>p&lt;0.01</b>   | No               | No                | <b>p&lt;0.01</b>  | <b>p&lt;0.05</b>   | No                 | <b>p&lt;0.01</b>  | No                | <b>p&lt;0.05</b>  |
| Up-slope                    | No                 | No               | No                | No                | <b>p&lt;0.01</b>   | No                 | No                | No                | No                |
| Max position                | <b>p&lt;0.01</b>   | No               | No                | No                | No                 | No                 | <b>p&lt;0.05</b>  | No                | No                |
| Down-slope                  | No                 | No               | No                | <b>p&lt;0.05</b>  | No                 | No                 | No                | No                | No                |
| Min position                | <b>p&lt;0.01</b>   | No               | No                | No                | No                 | No                 | No                | <b>p&lt;0.05</b>  | No                |

Bold indicates significant effect by ANOVA ( $p < 0.05$ ). “No” means nonsignificant effect of strain by ANOVA ( $p > 0.05$ ).
